# Supplementary material
Source: Elsevier journal article supplement (https://www.sciencedirect.com/science/article/pii/S1885585717303687)

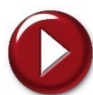

## Supplementary material

### Bifurcation Culprit Lesions in ST-segment Elevation Myocardial Infarction: Procedural Success and 5-year Outcome Compared With Nonbifurcation Lesions

#### Selection of (Bifurcation) Cases and Controls

**Figure 1 of the supplementary material.** Flow diagram showing the selection of bifurcation cases from initial database interrogation.

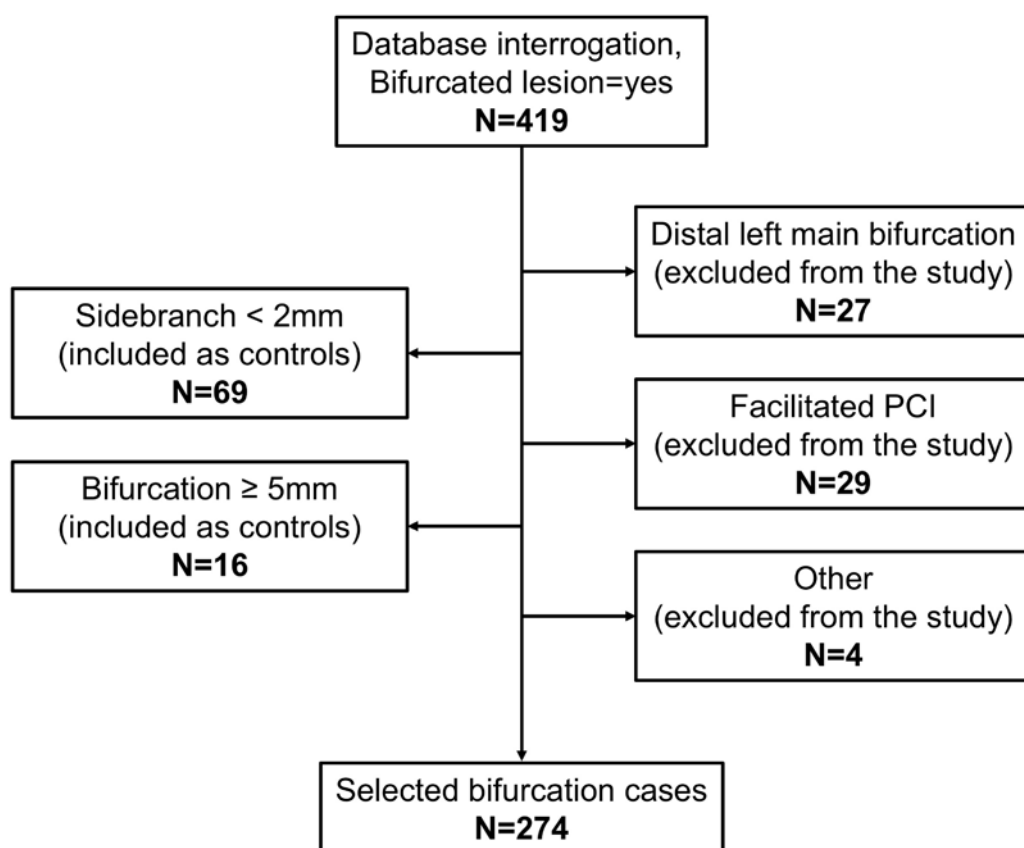

PCI, percutaneous coronary intervention.

**Table 1 of the supplementary material**

Quality Control of the Adjudication of Nonbifurcation Cases (Controls) in our Database

| Controls reviewed | True controls | False controls | Prevalence of 'false controls' | 95%CI              |
|-------------------|---------------|----------------|--------------------------------|--------------------|
| 153               | 152 (99.35%)  | 1 (0.65%)      | 0.0065 (SE 0.01)               | -0.0061 to -0.0190 |

It was estimated that a sample of 103 out of the 2472 controls would be enough to estimate a prevalence of incorrect adjudication of controls, with 95%CI and 90% power. Fifty more patients were reviewed up to a total of 153 control patients out of 2198 nonmatched controls. 95%CI, 95% confidence interval; SE, standard error.

## Primary Percutaneous Coronary Intervention and Rescue Percutaneous Coronary Intervention

Table 2 of the supplementary material

Clinical and Anatomic Characteristics, Before and After Propensity Matching

| Variable                                        | Primary PCI (n = 456)  |                       |     | Rescue PCI (n = 92)   |                      |     |
|-------------------------------------------------|------------------------|-----------------------|-----|-----------------------|----------------------|-----|
|                                                 | BIF group<br>(n = 226) | MC group<br>(n = 230) | P   | BIF group<br>(n = 48) | MC group<br>(n = 44) | P   |
| <b>Coronary anatomy</b>                         |                        |                       |     |                       |                      |     |
| <i>Number of diseased vessels<sup>a</sup></i>   |                        |                       |     |                       |                      |     |
| 0 <sup>b</sup>                                  | 7 (3)                  | 6 (3)                 | .86 | 2 (4)                 | 0 (0)                | .39 |
| 1                                               | 129 (56)               | 122 (49)              |     | 25 (52)               | 28 (64)              |     |
| 2                                               | 64 (28)                | 71 (31)               |     | 15 (31)               | 10 (23)              |     |
| 3                                               | 30 (13)                | 27 (12)               |     | 6 (12)                | 3 (6)                |     |
| <i>Mean number of severely diseased vessels</i> | 1.34 ± 0.7             | 1.24 ± 0.6            | .28 | 1.36 ± 0.7            | 1.27 ± 0.7           | .52 |
| <i>Dominance</i>                                |                        |                       |     |                       |                      |     |
| Left                                            | 14 (6)                 | 16 (7)                | .60 | 6 (13)                | 2 (5)                | .38 |
| Right                                           | 187 (83)               | 182 (79)              |     | 36 (75)               | 37 (84)              |     |
| Balanced                                        | 25 (11)                | 32 (14)               |     | 6 (13)                | 5 (11)               |     |
| <i>Culprit vessel<sup>a</sup></i>               |                        |                       |     |                       |                      |     |
| LAD                                             | 128 (57)               | 119 (52)              | .15 | 31 (65)               | 28 (64)              | .47 |
| LCX                                             | 29 (13)                | 48 (21)               |     | 10 (21)               | 5 (11)               |     |
| RCA                                             | 45 (20)                | 41 (18)               |     | 5 (10)                | 8 (18)               |     |

|       |         |         |  |       |       |  |
|-------|---------|---------|--|-------|-------|--|
| Other | 24 (11) | 22 (10) |  | 2 (4) | 3 (7) |  |
|-------|---------|---------|--|-------|-------|--|

BIF, bifurcation; BMI, body mass index; CAD, coronary artery disease; LAD, left anterior descending

artery; LCx, left circumflex; MC, matched control; PCI, percutaneous coronary intervention; RCA, right coronary artery.

The data are expressed as mean ± standard deviation or No. (%).

<sup>a</sup>Indicates the variables included in the propensity score.

<sup>b</sup>Secondary vessel disease only.

**Table 3 of the supplementary material**

Procedural Characteristics, Before and After Propensity-matched Analysis

|                                           | Primary PCI (n=456) |                    |        | Rescue PCI (n=92)  |                   |        |
|-------------------------------------------|---------------------|--------------------|--------|--------------------|-------------------|--------|
| Variable                                  | BIF group (n = 226) | MC group (n = 230) | P      | BIF group (n = 48) | MC group (n = 44) | P      |
| Symptoms to PCI <sup>a</sup> , min        | 263 ± 235           | 276 ± 226          | .57    | 402 ± 236          | 429 ± 252         | .59    |
| Radial access                             | 81 (36)             | 70 (30)            | .22    | 5 (10)             | 13 (30)           | .03    |
| Contrast, mL                              | 250 ± 89            | 233 ± 83           | < .001 | 283 ± 75           | 212 ± 73          | < .001 |
| Procedural time, min                      | 68 ± 29             | 63 ± 29            | .04    | 77 ± 29            | 62 ± 31           | .017   |
| Fluoroscopy time, min                     | 19 ± 13             | 14 ± 8             | < .001 | 19 ± 9             | 14 ± 6            | .003   |
| Number of treated lesions <sup>b</sup>    | 1.20 ± 0.5          | 1.18 ± 0.5         | .73    | 1.25 ± 0.5         | 1.18 ± 0.4        | .51    |
| Any aspiration thrombectomy <sup>b</sup>  | 108 (48)            | 118 (52)           | .64    | 19 (40)            | 29 (60)           | .21    |
| Any balloon dilatation <sup>b</sup>       | 169 (75)            | 138 (60)           | .001   | 30 (63)            | 23 (52)           | .32    |
| Number of different balloons <sup>b</sup> | 1.63 ± 1.4          | 1.12 ± 1.1         | < .001 | 0.81 ± 1.0         | 0.89 ± 0.9        | .72    |
| Any stent implantation <sup>b</sup>       | 204 (90)            | 203 (88)           | .49    | 45 (94)            | 43 (98)           | .62    |
| Number of implanted stents <sup>b</sup>   | 1.23 ± 0.7          | 1.12 ± 0.7         | .09    | 1.23 ± 0.6         | 1.27 ± 0.6        | .73    |
| Direct stenting <sup>c</sup>              | 76 (34)             | 107 (47)           | .005   | 20 (42)            | 26 (59)           | .09    |

BIF, bifurcation; MC, matched control; PCI, percutaneous coronary intervention.

The data are expressed as mean ± standard deviation or No. (%).

<sup>a</sup>Indicates the variables included in the propensity score.<sup>b</sup>Per patient.<sup>c</sup>Per patient with at least 1 stent implanted.

**Table 4 of the supplementary material**

Events at 5 Years of Follow-up, and HR From Cox Regression Analysis (Crude and Adjusted to Rescue Percutaneous Coronary Intervention, Drug-eluting Stent, Aspiration Thrombectomy and Use of IIb/IIIa Inhibitors)

|                                          | BIF<br>(n = 274) | MC<br>(n = 274) | <i>P</i> | HR (95%CI)        | <i>P</i> adj | HRadj (95%CI)     |
|------------------------------------------|------------------|-----------------|----------|-------------------|--------------|-------------------|
| Death                                    | 33 (12)          | 35 (13)         | .95      | 0.98 (0.61-1.59)  | .71          | 1.10 (0.68-1.77)  |
| Cardiac death                            | 26 (10)          | 23 (8)          | .59      | 1.17 (0.67-2.05)  | .37          | 1.30 (0.74-2.28)  |
| Combined event (death, CABG, AMI or TVR) | 61 (22)          | 56 (21)         | .43      | 1.16 (0.80-1.66)  | .31          | 1.21 (0.84-1.74)  |
| Recurrent MI                             | 14 (5)           | 11 (4)          | .49      | 1.32 (0.60-2.91)  | .51          | 1.30 (0.59-2.87)  |
| CABG                                     | 8 (2.9)          | 3 (1.1)         | .12      | 2.69 (0.72-10.16) | .10          | 3.03 (0.80-11.52) |
| TVR                                      | 23 (8)           | 14 (5)          | .11      | 1.70 (0.87-3.30)  | .10          | 1.74 (0.89-3.39)  |

95%CI, 95% confidence interval; AMI, acute myocardial infarction; BIF, bifurcation; CABG, coronary

artery bypass graft; HR, hazard ratio; MC, matched control; MI, myocardial infarction; TVR, target vessel

revascularization.

Figure 2 of the supplementary material

Survival free from all cause death (A) and the composite event of death, recurrent MI, CABG or TVR (B), stratified by rescue or primary PCI.

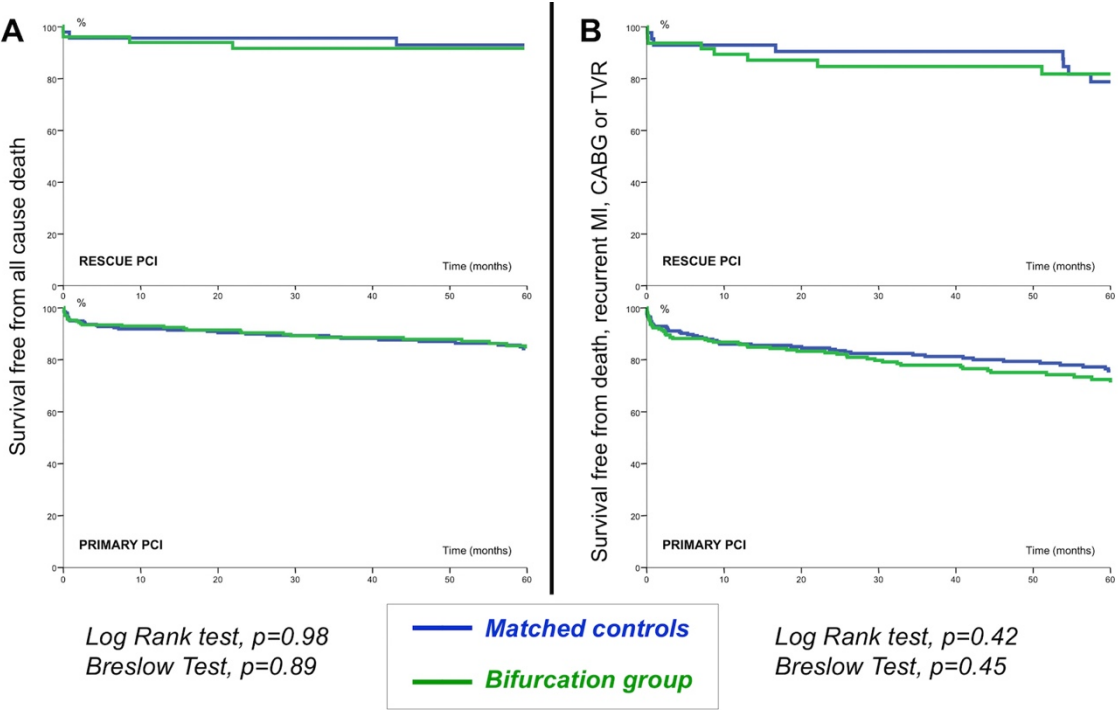

Supplement: mmc1 [file S1885585717303687:mmc1.pdf]
